# Supplementary material for: Modified Biochar as a More Promising Amendment Agent for Remediation of Pesticide-Contaminated Soils: Modification Methods, Mechanisms, Applications, and Future Perspectives
Source: MDPI journal article supplement (doi:10.3390/app122211544), 2022-11-14
Supplement: s1 [file s1]

Table S1. Chemical properties of different pesticide contaminants

| Type of contaminant | Contaminant (Pesticide)             | Acidity and alkalinity | Hydrophobicity     | Polarity and nonpolarity |
|---------------------|-------------------------------------|------------------------|--------------------|--------------------------|
| Herbicide           | oxyfluorfen                         | Acidic                 | Insoluble          | Nonpolarity              |
|                     | bentazone                           | Stable                 | Slightly soluble   | Nonpolarity              |
|                     | 4-chloro-2-methylphenoxyacetic acid | Alkalinity             | Insoluble          | Nonpolarity              |
|                     | atrazine                            | stable                 | Slightly soluble   | Nonpolarity              |
|                     | metolachlor                         | Acidic                 | Slightly soluble   | Nonpolarity              |
|                     | Sulfonylurea herbicides             | Acidic                 | Slightly soluble   | Polarity                 |
|                     | dicamba                             | Acidic                 | Soluble            | Polarity                 |
|                     | glyphosate                          | Acidic                 | Slightly soluble   | Polarity                 |
|                     | 2,4-dichlorophenoxyacetic acid      | Acidic                 | Slightly soluble   | Nonpolarity              |
|                     | trifluralin                         | Acidic                 | Insoluble          | Nonpolarity              |
|                     | diuron                              | Neutral                | Slightly soluble   | Nonpolarity              |
|                     | bispyribac-sodium                   | Acidic                 | Soluble            | Polarity                 |
|                     | fomesafen                           | Acidic                 | Soluble            | Polarity                 |
|                     | linuron                             | Acidic                 | Insoluble          | Nonpolarity              |
|                     | monuron                             | Acidic                 | Insoluble          | Nonpolarity              |
|                     | sulfentrazone                       | Acidic                 | Insoluble          | Nonpolarity              |
|                     | acetochlor                          | Acidic                 | Soluble            | Nonpolarity              |
|                     | fenoxaprop-ethyl                    | Acidic                 | Insoluble          | Nonpolarity              |
|                     | simazine                            | Acidic                 | Slightly soluble   | Nonpolarity              |
|                     | imazapic                            | Acidic                 | Readily soluble    | Polarity                 |
|                     | isoproturon                         | Stable                 | Slightly soluble   | Nonpolarity              |
|                     | aminocyclopyrachlor                 | Acidic<br>Stable       | Readily soluble    | Polarity                 |
|                     | clomazone                           | Acidic                 | Readily soluble    | Polarity                 |
|                     | carbofuran                          | Acidic                 | Slightly soluble   | Nonpolarity              |
|                     | Fipronil                            | Acidic                 | Slightly soluble   | Nonpolarity              |
|                     | ethiprole                           | Stable                 | Slightly soluble   | Nonpolarity              |
|                     | trichloroethylene                   | Acidic                 | Slightly soluble   | Nonpolarity              |
|                     | carbaryl                            | Acidic                 | Insoluble in water | Nonpolarity              |
| Insecticide         | metolachlor                         | Acidic                 | Readily soluble    | Polarity                 |
|                     | flubendiamide                       | Acidic                 | Slightly soluble   | Nonpolarity              |
|                     | imidacloprid                        | Neutral                | Slightly soluble   | Polarity                 |
|                     | dichlorvos                          | Acidic                 | Slightly soluble   | Nonpolarity              |
|                     | aldrin                              | Alkalinity             | Insoluble          | Nonpolarity              |
|                     | chlorpyrifos                        | Acidic                 | Insoluble          | Nonpolarity              |
|                     | thiacloprid                         | Acidic                 | Insoluble          | Nonpolarity              |
|                     | methyl isothiocyanate               | Acidic                 | Slightly soluble   | Nonpolarity              |
| Bactericide         | tebuconazole                        | Acidic                 | Slightly soluble   | Nonpolarity              |

**Table S2.** Comparison of biochar and modified biochar on adsorption capacity and removal rate.

| Raw material                           | Pyrolysis temperature<br>°C | Contaminant                                        | Biochar    |                                                             |                                                          |                                                      |                       | Modification method                                                                   | Modified Biochar |                                                             |                                                          |                                                      |                       | Reference |
|----------------------------------------|-----------------------------|----------------------------------------------------|------------|-------------------------------------------------------------|----------------------------------------------------------|------------------------------------------------------|-----------------------|---------------------------------------------------------------------------------------|------------------|-------------------------------------------------------------|----------------------------------------------------------|------------------------------------------------------|-----------------------|-----------|
|                                        |                             |                                                    | pH         | Specific surface area<br>(m <sup>2</sup> ·g <sup>-1</sup> ) | Total pore volume<br>(cm <sup>3</sup> ·g <sup>-1</sup> ) | Maximum adsorption capacity<br>(mg·g <sup>-1</sup> ) | Maximum removal rate% |                                                                                       | pH               | Specific surface area<br>(m <sup>2</sup> ·g <sup>-1</sup> ) | Total pore volume<br>(cm <sup>3</sup> ·g <sup>-1</sup> ) | Maximum adsorption capacity<br>(mg·g <sup>-1</sup> ) | Maximum removal rate% |           |
| walnut shell                           | 700                         | metolachlor (herbicide)                            | 7          | 158.67                                                      | 0.22                                                     | 72.99                                                | 57%                   | illite FeCl <sub>3</sub>                                                              | 7                | 232.77                                                      | 0.29                                                     | 126.72                                               | 95%                   | [49]      |
| oil palm empty fruit bunch             | 300                         | imazapic (herbicide)                               | 7.14       | 1.46                                                        | —                                                        | increase by 8 %                                      | —                     | chitosan                                                                              | 8.14             | 1.19                                                        | —                                                        | increase by 75 %                                     | —                     | [50]      |
| pinus radiata shavings                 | 450                         | isoproturon (herbicide)                            | —          | 166                                                         | 0.0474                                                   | 73.03                                                | 26.18%                | Al-oxide                                                                              | —                | 219                                                         | 0.0681                                                   | 146.054                                              | 56.72%                | [51]      |
| <i>Moringa oleifera</i> Lam. seed husk | 300                         | atrazine (herbicide)                               | —          | 1.52                                                        | 0.0210                                                   | —                                                    | —                     | nitric acid                                                                           | —                | 5.77                                                        | 0.0409                                                   | 10.321                                               | 33.03%                | [52]      |
| phragmite powders                      | 500                         | glyphosate (herbicide)                             | —          | 8.3                                                         | 0.04                                                     | 200                                                  | 73.42%                | nano CuFe <sub>2</sub> O <sub>4</sub>                                                 | —                | 189.6                                                       | 0.12                                                     | 269.4                                                | 98.9%                 | [53]      |
| rice husk                              | 700                         | carbofuran (insecticide)                           | 9.87       | 236.74                                                      | 0.05                                                     | 132.87                                               | 13.29%                | steam activated Ni(NO <sub>3</sub> ) <sub>2</sub> FeCl <sub>3</sub> ZnCl <sub>2</sub> | 10.12            | 251.47                                                      | 0.083                                                    | 160.77                                               | 16.08%                | [54]      |
| corn stalk                             | 600                         | atrazine (herbicide)                               | 10         | 20.51                                                       | —                                                        | 95.93                                                | 47.97%                |                                                                                       | 10               | 14.26                                                       | —                                                        | 143.15                                               | 71.58%                | [55]      |
| corn straw                             | 300                         | atrazine (herbicide)                               | —          | 6.678                                                       | —                                                        | 31.51                                                | 38%                   | H <sub>3</sub> PO <sub>4</sub>                                                        | —                | 638.1                                                       | —                                                        | 79.6                                                 | 96%                   | [56]      |
| corn straw                             | 500                         | atrazine (herbicide)                               | 7          | 32.85                                                       | 0.0148                                                   | 1.94                                                 | 60.11%                | KOH                                                                                   | 7                | 59.23                                                       | 0.0231                                                   | 2.84                                                 | 88%                   | [59]      |
| rice straw                             | 600                         | imidacloprid (insecticide)                         | 8.82       | 220.2                                                       | 0.646                                                    | 0.04                                                 | 77.8%                 | H <sub>3</sub> PO <sub>4</sub>                                                        | 6.93             | 192.3                                                       | 0.161                                                    | 0.05                                                 | 89.5%                 | [60]      |
| corn stalk                             | 600                         | 2,4-dichlorophenoxyacetic acid (2,4-D) (herbicide) | 3.83 ±0.21 | 523.04                                                      | 0.658                                                    | 8.54                                                 | 14.23%                | K <sub>2</sub> CO <sub>3</sub> H <sub>2</sub> SO <sub>4</sub> HNO <sub>3</sub>        | 2.38 ±0.01       | 691.28                                                      | 0.943                                                    | 22.84                                                | 38.07%                | [61]      |
| tea waste                              | 500                         | imidacloprid (insecticide)                         | 7±0.2      | —                                                           | —                                                        | 3.82                                                 | 62.9%                 | Chitosan AgNO <sub>3</sub>                                                            | 7±0.2            | —                                                           | —                                                        | 5.643                                                | 93%                   | [64]      |
